# Supplementary material
Source: Springer Nature journal article supplement (https://www.springermedizin.de/resource/supplementary/13049_2011_482_MOESM2_ESM.pdf/9666498)

Kopf nach hinten strecken

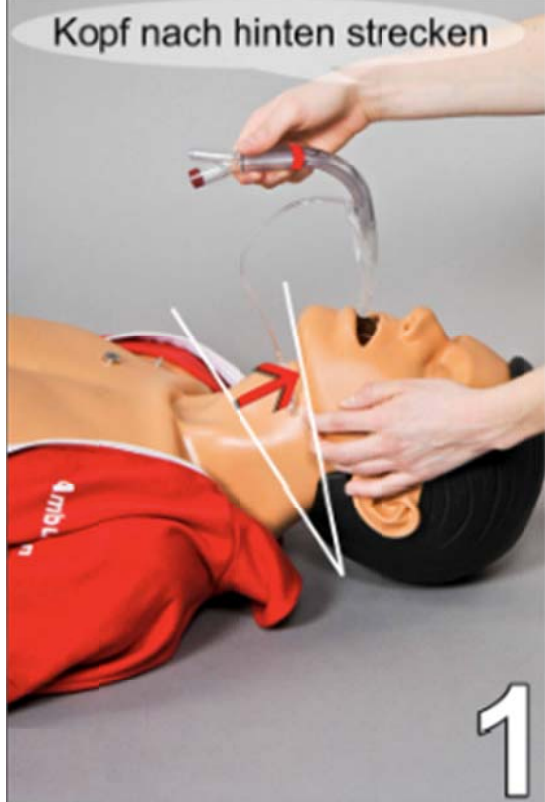

Schlauch bis zur Markierung einführen

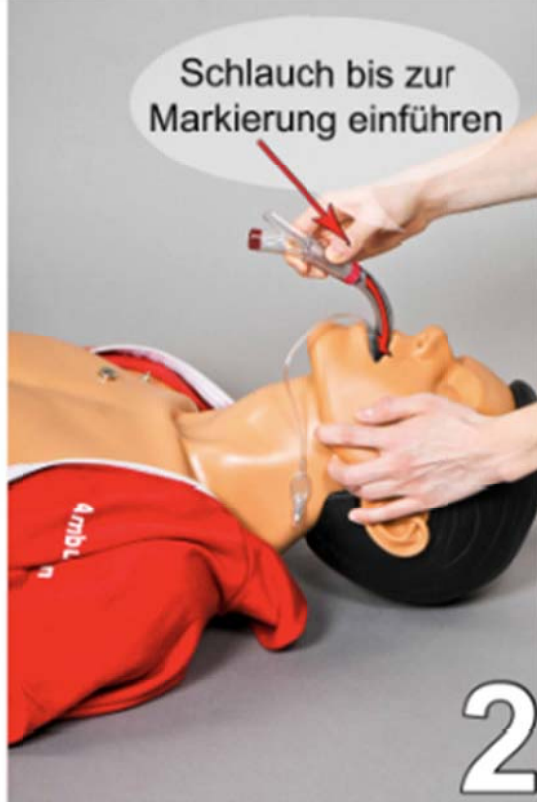

20 ml Luft

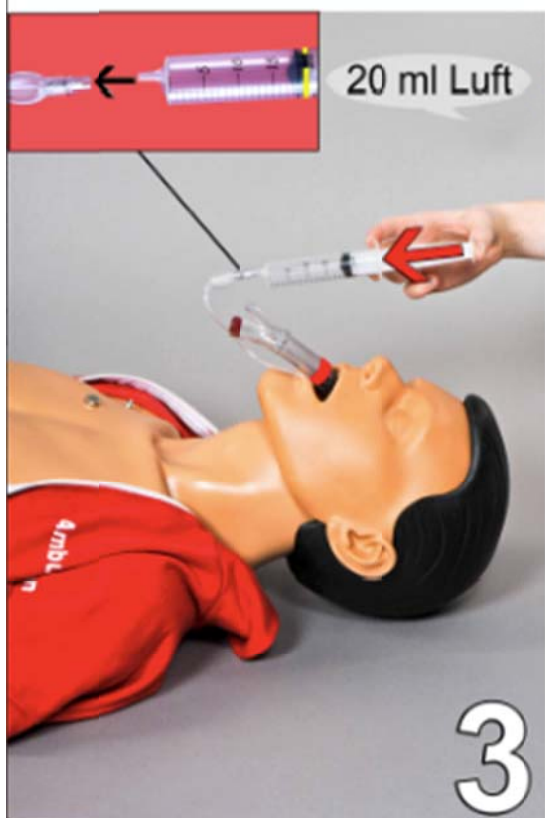

**5x**  
Beutel drücken

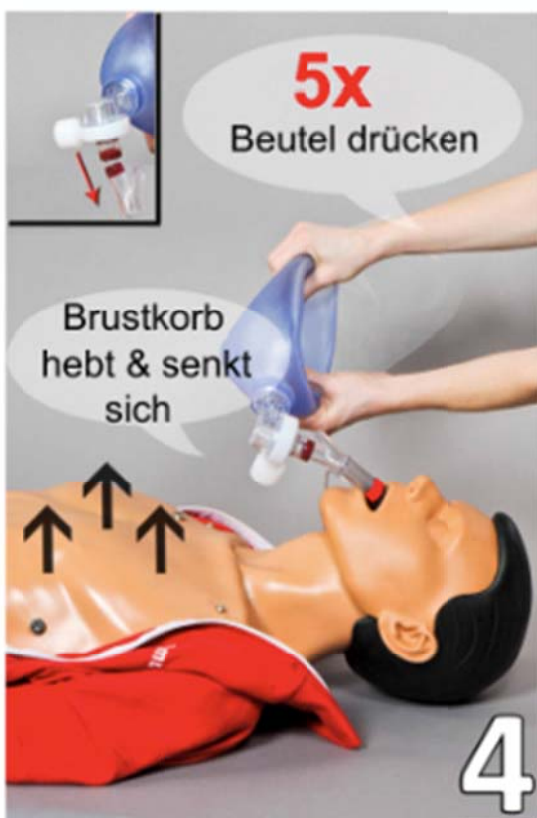

Supplement: MOESM2 [file 9666498]
